# Supplementary material for: In Vitro Digestion Assessment (Standard vs. Older Adult Model) on Antioxidant Properties and Mineral Bioaccessibility of Fermented Dried Lentils and Quinoa
Source: MDPI journal article supplement (doi:10.3390/molecules28217298), 2023-10-27
Supplement: s1 [file s1]

## ELECTRONIC SUPPLEMENTARY MATERIAL

### **In vitro digestion assessment (standard vs. older adult model) on antioxidant properties and mineral bioaccessibility of fermented-dried lentils and quinoa**

Janaina Sánchez-García<sup>1</sup>, Sara Muñoz-Pina<sup>1\*</sup>, Jorge García-Hernández<sup>2</sup>, Amparo Tárrega<sup>3</sup>, Ana Heredia<sup>1</sup>, Ana Andrés<sup>1</sup>

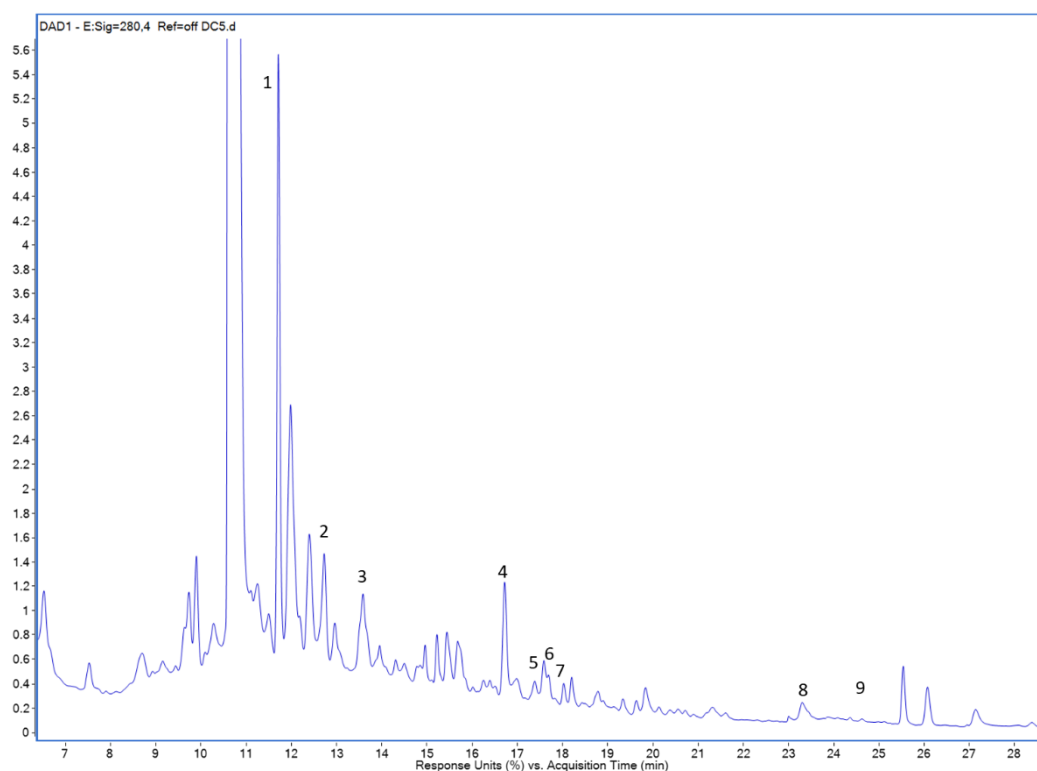

**Figure S1.** Chromatographic profile of Unfermented Pardina Lentil (UFPL) digested (standard) extracted at 280 nm. 1: 4-O-Caffeoylquinic; 2: 4-Hydroxybenzoic acid; 3: Vanillic acid; 4: p-Coumaric acid; 5: Ferulic acid; 6: Quercitrin; 7: Apigenin-7-glucoside; 8: Quercetin; 9: trans-Cinnamic acid. Note: not all the compounds are quantified at 280 nm.

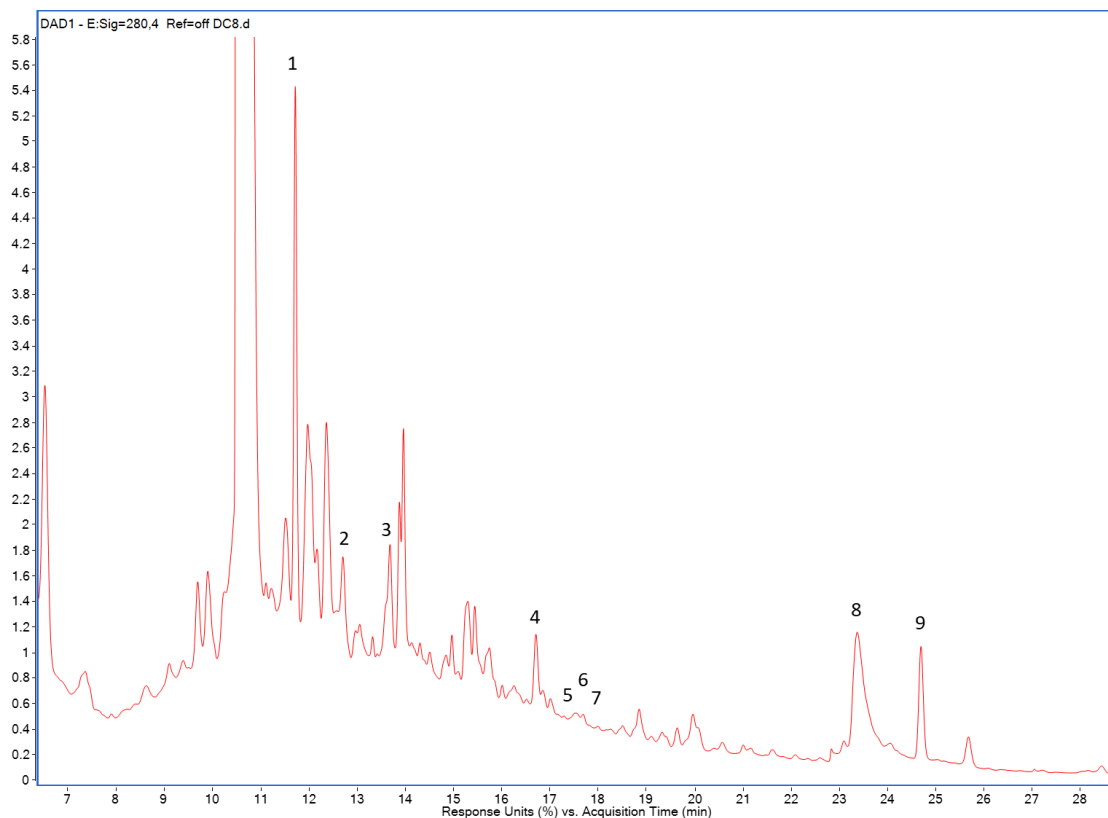

**Figure S2.** Chromatographic profile of Fermented Pardina Lentil (FPL) digested (standard) extracted at 280 nm. 1: 4-O-Caffeoylquinic; 2: 4-Hydroxybenzoic acid; 3: Vanillic acid; 4: p-Coumaric acid; 5: Ferulic acid; 6: Quercitrin; 7: Apigenin-7-glucoside; 8: Quercetin; 9: trans-Cinnamic acid. Note: not all the compounds are quantified at 280 nm.

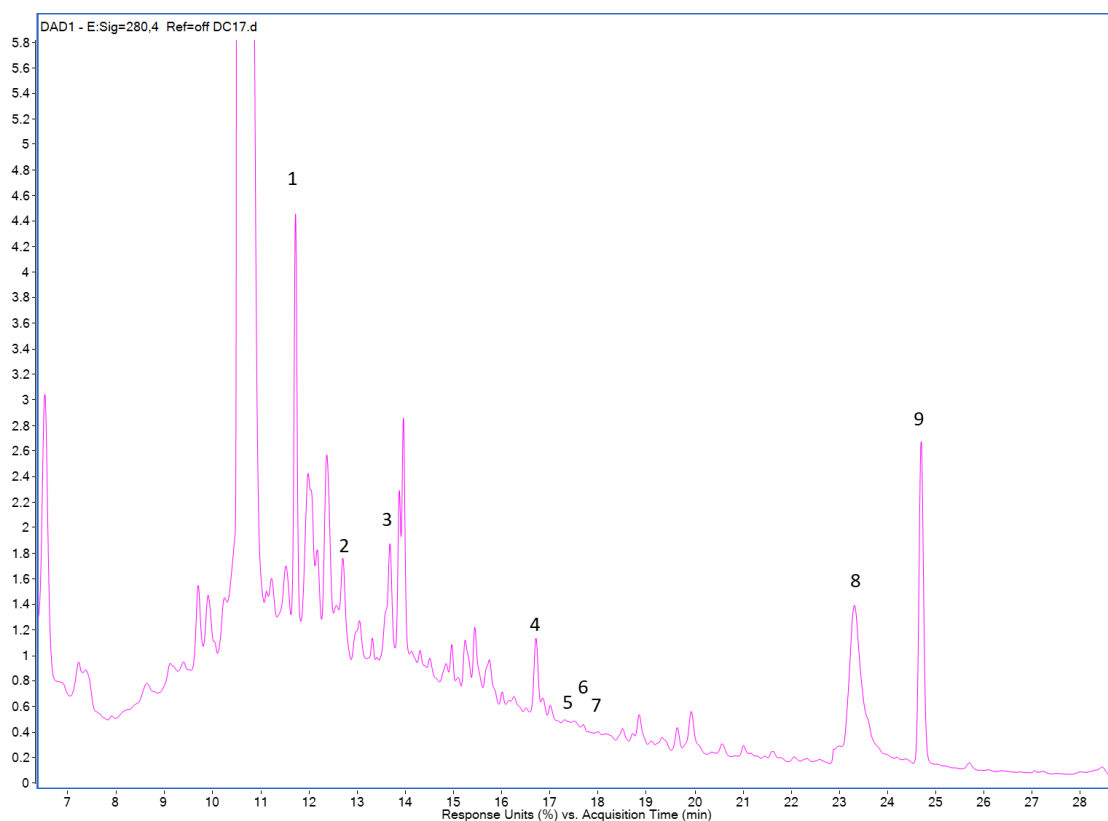

**Figure S3.** Chromatographic profile of Fermented-dried at 70 °C Pardina Lentil (FPL-70) digested (standard) extracted at 280 nm. 1: 4-O-Caffeoylquinic; 2: 4-Hydroxybenzoic acid; 3: Vanillic acid; 4: p-Coumaric acid; 5: Ferulic acid; 6: Quercitrin; 7: Apigenin-7-glucoside; 8: Quercetin; 9: trans-Cinnamic acid. Note: not all the compounds are quantified at 280 nm.

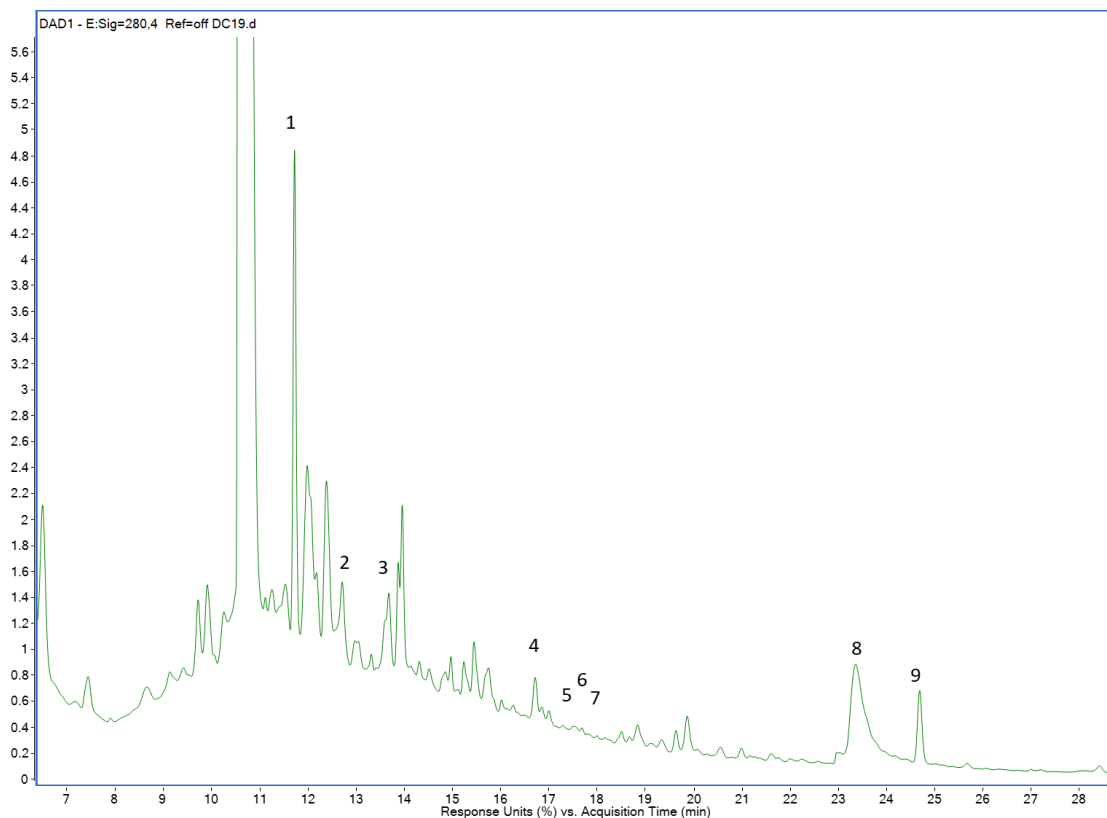

**Figure S4.** Chromatographic profile of Fermented-lyophilised Pardina Lentil (FPL-L) digested (standard) extracted at 280 nm. 1: 4-O-Caffeoylquinic; 2: 4-Hydroxybenzoic acid; 3: Vanillic acid; 4: p-Coumaric acid; 5: Ferulic acid; 6: Quercitrin; 7: Apigenin-7-glucoside; 8: Quercetin; 9: trans-Cinnamic acid. Note: not all the compounds are quantified at 280 nm.

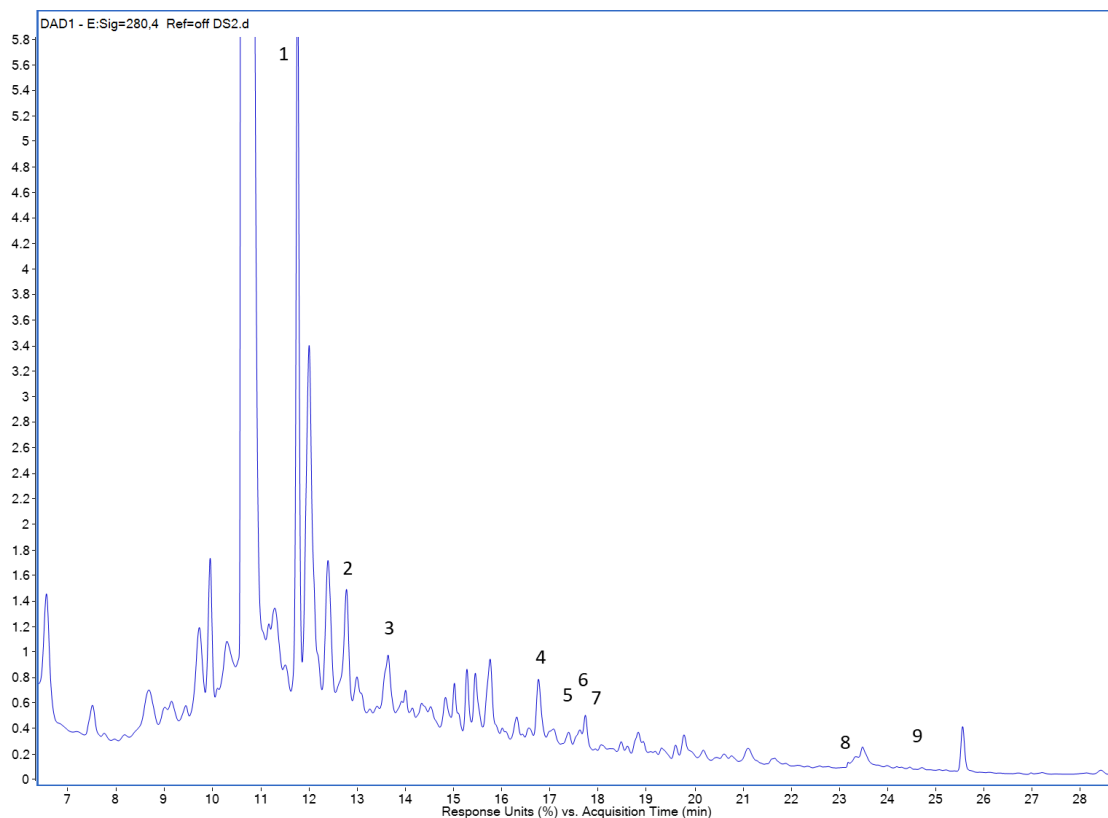

**Figure S5.** Chromatographic profile of Unfermented Pardina Lentil (UFPL) digested (Older adult) extracted at 280 nm. 1: 4-O-Caffeoylquinic; 2: 4-Hydroxybenzoic acid; 3: Vanillic acid; 4: p-Coumaric acid; 5: Ferulic acid; 6: Quercitrin; 7: Apigenin-7-glucoside; 8: Quercetin; 9: trans-Cinnamic acid. Note: not all the compounds are quantified at 280 nm.

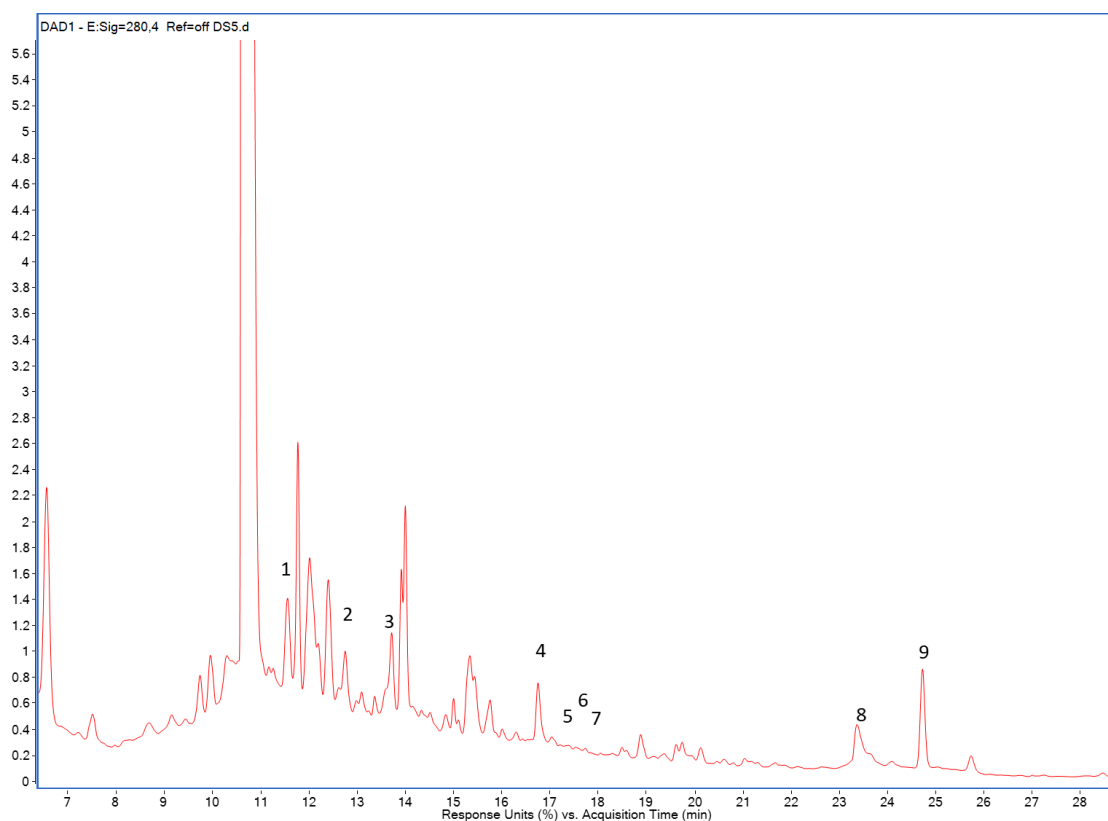

**Figure S6.** Chromatographic profile of Fermented Pardina Lentil (FPL) digested (Older adult) extracted at 280 nm. 1: 4-O-Caffeoylquinic; 2: 4-Hydroxybenzoic acid; 3: Vanillic acid; 4: p-Coumaric acid; 5: Ferulic acid; 6: Quercitrin; 7: Apigenin-7-glucoside; 8: Quercetin; 9: trans-Cinnamic acid. Note: not all the compounds are quantified at 280 nm.

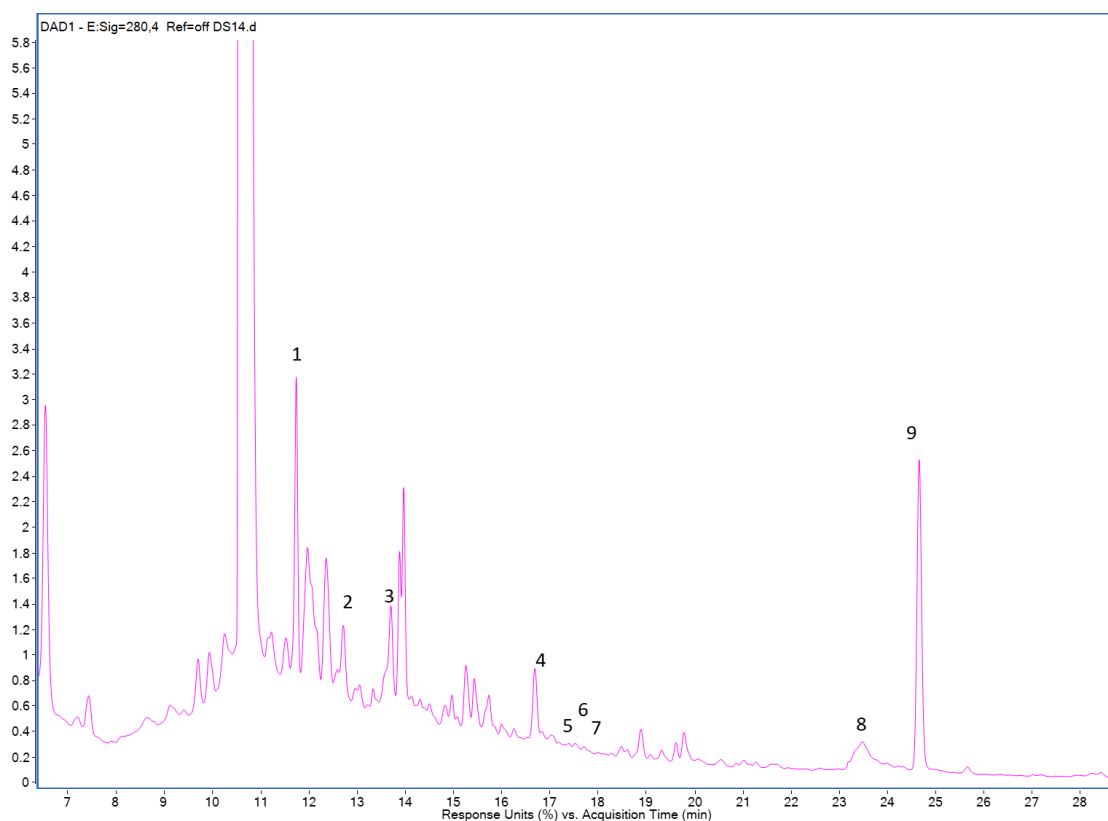

**Figure S7.** Chromatographic profile of Fermented-dried at 70 °C Pardina lentil (FPL-70) digested (Older adult) extracted at 280 nm. 1: 4-O-Caffeoylquinic; 2: 4-Hydroxybenzoic acid; 3: Vanillic acid; 4: p-Coumaric acid; 5: Ferulic acid; 6: Quercitrin; 7: Apigenin-7-glucoside; 8: Quercetin; 9: trans-Cinnamic acid. Note: not all the compounds are quantified at 280 nm.

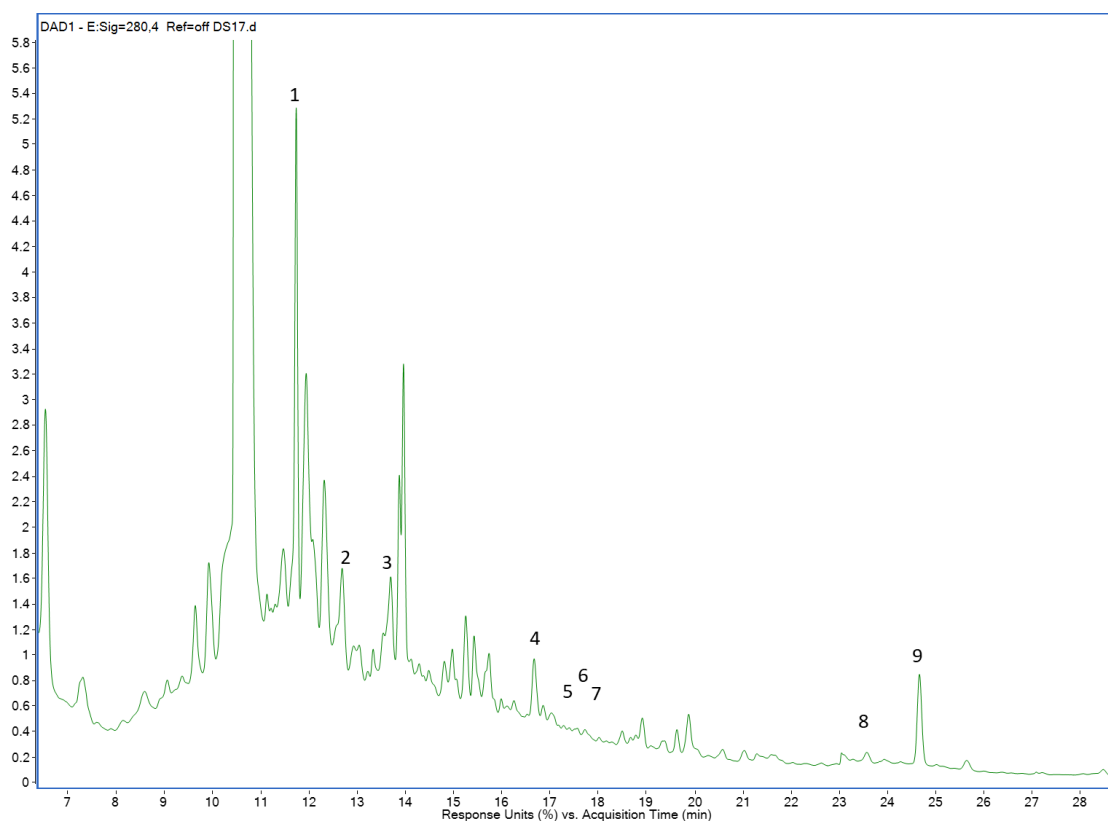

**Figure S8.** Chromatographic profile of Fermented-lyophilised Pardina Lentil (FPL-L) digested (Older adult) extracted at 280 nm. 1: 4-O-Caffeoylquinic; 2: 4-Hydroxybenzoic acid; 3: Vanillic acid; 4: p-Coumaric acid; 5: Ferulic acid; 6: Quercitrin; 7: Apigenin-7-glucoside; 8: Quercetin; 9: trans-Cinnamic acid. Note: not all the compounds are quantified at 280 nm.
